# Supplementary material for: Targeting neuronal lysosomal dysfunction caused by β-glucocerebrosidase deficiency with an enzyme-based brain shuttle construct
Source: Nat Commun. 2023 Apr 12;14:2057. doi: 10.1038/s41467-023-37632-4 (PMC10097658; doi:10.1038/s41467-023-37632-4)
Supplement: Supplementary file 3 — Supplementary Data 1 [file 41467_2023_37632_MOESM3_ESM.xlsx]

## Sheet: bonafide lysosomal protein list
Gene Symbol
ABCB6
ABCD4
ACP2
ACP5
AGA
AKT1S1
ARL8A
ARL8B
ARSA
ARSB
ARSK
ASAH1
ATP6AP1
ATP6V0A1
ATP6V0C
ATP6V0D1
ATP6V1A
ATP6V1B2
ATP6V1C1
ATP6V1D
ATP6V1E1
ATP6V1F
ATP6V1G1
ATP6V1H
ATRAID
BAX
BLOC1S1
BLOC1S2
BORCS5
BORCS6
BORCS7
BORCS8
CD63
CD68
CLCN7
CLN3
CLN5
CPQ
CPVL
CREG1
CTBS
CTSA
CTSB
CTSC
CTSD
CTSH
CTSL
DNASE2
DPP7
ENTPD4
EPDR1
FUCA1
FYCO1
GAA
GALNS
GBA
GGH
GLA
GLB1
GLMP
GM2A
GNS
GPR137B
GUSB
HEXA
HEXB
HGSNAT
HPSE
IDS
IDUA
IFI30
KXD1
LAMP1
LAMP2
LAMTOR1
LAMTOR2
LAMTOR3
LAMTOR4
LAMTOR5
LAPTM4A
LAPTM4B
LGALS3
LGALS8
LGMN
LIPA
LITAF
LMBRD1
MAN2B1
MAN2B2
MANBA
MCOLN1
MFSD1
MLST8
MTOR
NAGA
NAGLU
NCSTN
NEU1
NPC1
NPC2
OSTM1
PCYOX1
PIP4P1
PIP4P2
PLA2G15
PLBD2
PLD3
PPT1
PPT2
PRCP
PSAP
PTTG1IP
RHEB
RNASET2
RPTOR
RRAGA
RRAGC
SCARB2
SCPEP1
SGSH
SIAE
SIDT2
SLC17A5
SLC26A11
SLC35F6
SLC37A3
SLC38A7
SLC38A9
SLC49A4
SMPD1
SNAPIN
SPPL2A
TMEM104
TMEM192
TMEM9
TPCN2
TPP1
TTYH2
TTYH3
VMA21
